# Supplementary material for: 31P solid-state NMR studies of the short-range order in phosphorus–selenium glasses
Source: Royal Society of Chemistry journal article supplement (doi:10.1039/b919118f), 2010-01-01
Supplement: b919118f.pdf [file b919118f.pdf]

## Electronic Supplementary Information

### **$^{31}\text{P}$ solid-state NMR studies of the short range order in phosphorus-selenium glasses**

A. Bytchkov, F. Fayon, D. Massiot, L. Hennet and D. L. Price

*Conditions Extrêmes et Matériaux : Haute Température et Irradiation (CEMHTI), 1D Av.  
Recherche Scientifique, 45071 Orléans Cedex 2, France, and Université d'Orléans, Faculté  
des Sciences, Av. Parc Floral, 45067 Orléans Cedex 2, France*

#### **Content:**

**ESI Figure 1:** Glass densities in the two glass-forming regions of the P-Se system.

**ESI Figure 2:** Measured glass transition temperatures of the P-Se system. The glass with 67 at.% of P showed two distinct  $T_g$ 's, the lower one being similar to Se-rich glasses.

**ESI figure 3:** 2D DQ-SQ through-bond MAS correlation spectrum of crystalline  $\alpha\text{-P}_4\text{Se}_3$  recorded using the refocused INADEQUATE at a spinning frequency of 26 kHz with a DQ excitation and reconversion times of 0.96 ms. The projection along the SQ dimension (black) and conventional 1D MAS spectrum (blue) are shown above the 2D spectrum.

**ESI figure 4:** 2D DQ-SQ through-bond MAS correlation spectrum of crystalline  $\beta\text{-P}_4\text{Se}_3$  recorded using the refocused INADEQUATE at a spinning frequency of 12 kHz with a DQ excitation/reconversion time of 2.0 ms. The projection along the SQ dimension is shown above the 2D spectrum.

**ESI figure 5:** Experimental (black)  $^{31}\text{P}$  MAS spectra of Se-rich phosphorus selenium glasses and their best fits (dashed red) including spinning sidebands, with the resonances of  $_{2/2}\text{SeP-PSe}_{2/2}$  (green),  $\text{P}_4\text{Se}_3$  (violet),  $\text{P}(\text{Se}_{1/2})_3$  (blue) and  $\text{Se}=\text{P}(\text{Se}_{1/2})_3$  (grey) structural units.

**ESI figure 6:** Experimental (black)  $^{31}\text{P}$  MAS spectra of P-rich phosphorus selenium glasses and their best fits (dashed red) with the resonances assigned to of  $\text{P}_4\text{Se}_3$  (violet), amorphous red-P like network and the two unidentified peaks.

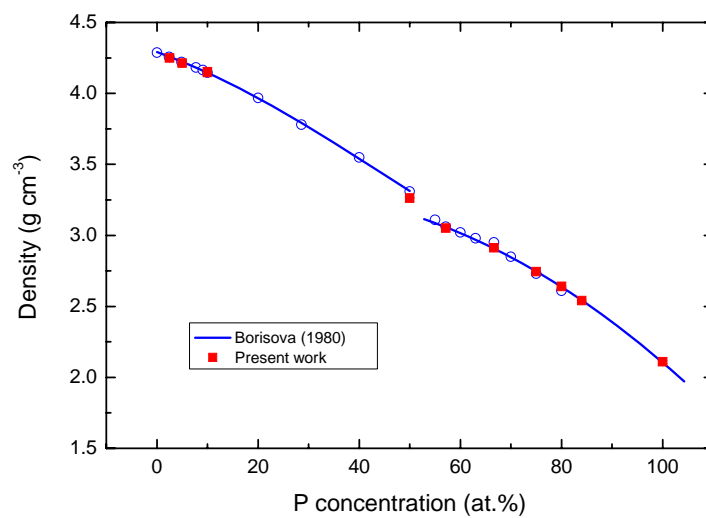

**ESI Figure 1:** Glass densities in the two glass-forming regions of the P-Se system.

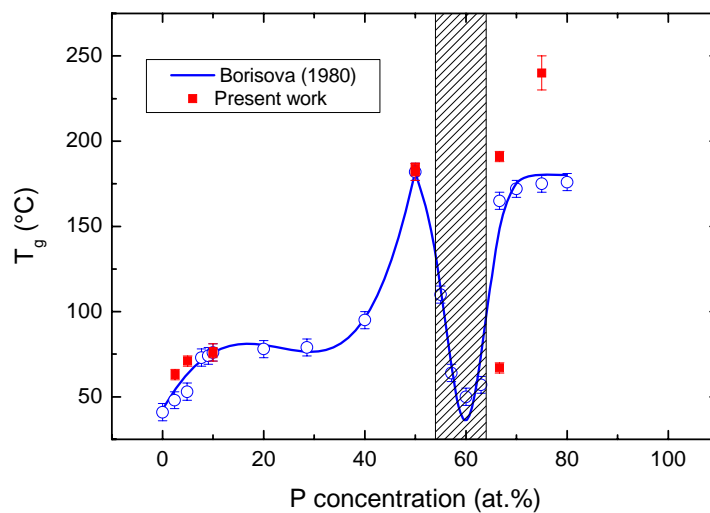

**ESI Figure 2:** Measured glass transition temperatures of the P-Se system. The glass with 67 at. % of P showed two distinct  $T_g$ 's, the lower one being similar to Se-rich glasses.

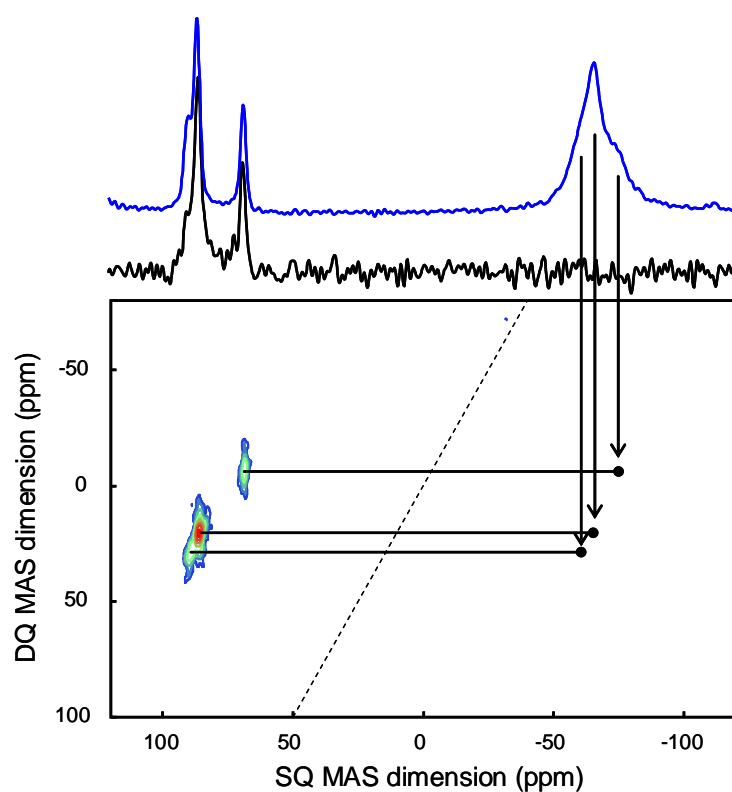

**ESI figure 3:** 2D DQ-SQ through-bond MAS correlation spectrum of crystalline  $\alpha$ -P<sub>4</sub>Se<sub>3</sub> recorded using the refocused INADEQUATE at a spinning frequency of 26 kHz with a DQ excitation and reconversion times of 0.96 ms. The projection along the SQ dimension (black) and conventional 1D MAS spectrum (blue) are shown above the 2D spectrum.

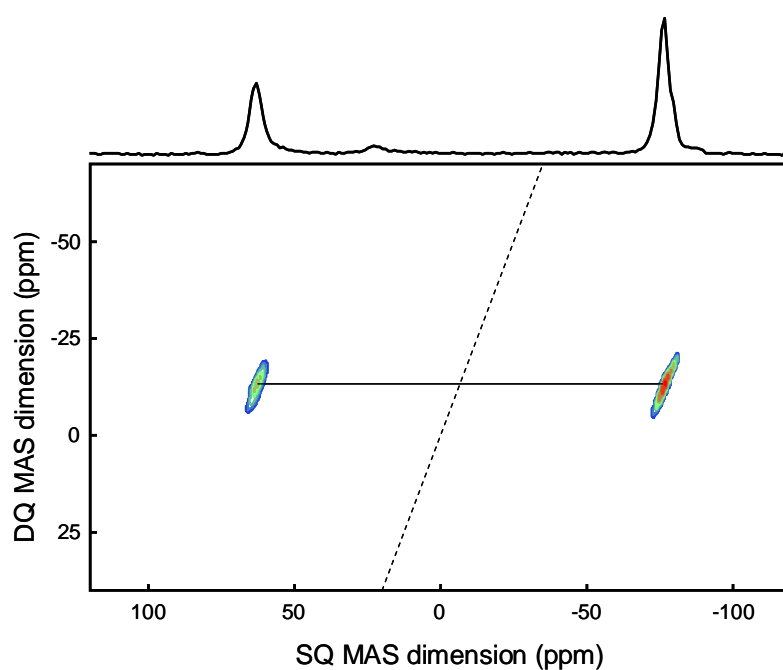

**ESI figure 4:** 2D DQ-SQ through-bond MAS correlation spectrum of crystalline  $\beta$ -P<sub>4</sub>Se<sub>3</sub> recorded using the refocused INADEQUATE at a spinning frequency of 12 kHz with a DQ excitation/reconversion time of 2.0 ms. The projection along the SQ dimension is shown above the 2D spectrum.

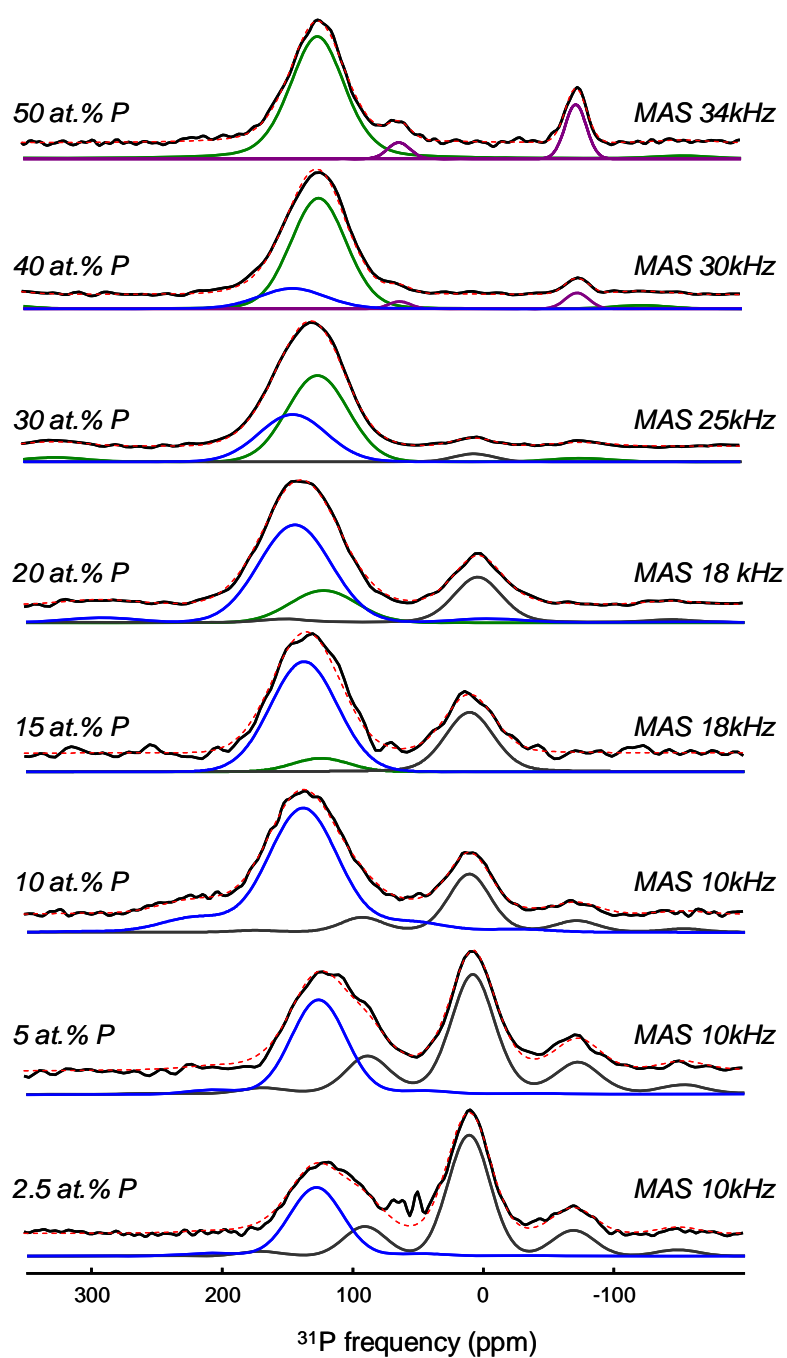

**ESI figure 5:** Experimental (black)  $^{31}\text{P}$  MAS spectra of Se-rich phosphorus selenium glasses and their best fits (dashed red) including spinning sidebands, with the resonances of  $_{2/2}\text{SeP-}$   $\text{PSe}_{2/2}$  (green),  $\text{P}_4\text{Se}_3$  (violet),  $\text{P}(\text{Se}_{1/2})_3$  (blue) and  $\text{Se}=\text{P}(\text{Se}_{1/2})_3$  (grey) structural units.
